# Supplementary material for: Myxococcus xanthus R31 Suppresses Tomato Bacterial Wilt by Inhibiting the Pathogen Ralstonia solanacearum With Secreted Proteins
Source: Front Microbiol. 2022 Feb 7;12:801091. doi: 10.3389/fmicb.2021.801091 (PMC8859152; doi:10.3389/fmicb.2021.801091)
Supplement: Supplementary file 3 [file Table_2.xlsx]

## Sheet: Sheet1
Supplementary Table 2. LC-MS/MS identified proteins list.
prot_hit_num	prot_acc	prot_desc	prot_score	prot_mass	prot_matches	prot_matches_sig	prot_sequences	prot_sequences_sig	prot_cover	prot_pi	emPAI
1	lcl|CP068048.1_prot_QQR48482.1_6967	[locus_tag=JKA73_35225] [protein=beta-propeller domain-containing protein] [protein_id=QQR48482.1] [location=complement(8728304..8730385)] [gbkey=CDS]	3120	77102	89	89	12	12	20.2	5.2	0.87
2	lcl|CP068048.1_prot_QQR43942.1_6700	[locus_tag=JKA73_33890] [protein=hypothetical protein] [protein_id=QQR43942.1] [location=complement(8418325..8419737)] [gbkey=CDS]	1024	49412	21	21	12	12	30	5.68	0.94
3	lcl|CP068048.1_prot_QQR44194.1_6984	[locus_tag=JKA73_35310] [protein=transporter] [protein_id=QQR44194.1] [location=8749836..8751029] [gbkey=CDS]	768	41973	16	16	5	5	19.4	5.83	0.52
4	lcl|CP068048.1_prot_QQR47922.1_3660	[locus_tag=JKA73_18575] [protein=DUF4082 domain-containing protein] [protein_id=QQR47922.1] [location=complement(4470540..4473926)] [gbkey=CDS]	714	118393	18	18	7	7	8.8	5.44	0.21
5	lcl|CP068048.1_prot_QQR45854.1_1367	[locus_tag=JKA73_06895] [protein=TonB-dependent receptor] [protein_id=QQR45854.1] [location=1657560..1660946] [gbkey=CDS]	545	122314	15	15	8	8	11.2	6.14	0.21
6	lcl|CP068048.1_prot_QQR45290.1_768	[locus_tag=JKA73_03900] [protein=hypothetical protein] [protein_id=QQR45290.1] [location=914546..916162] [gbkey=CDS]	436	57926	19	19	6	6	11.9	4.82	0.3
7	lcl|CP068048.1_prot_QQR44089.1_6861	[locus_tag=JKA73_34695] [protein=TonB-dependent receptor] [protein_id=QQR44089.1] [location=8595788..8597881] [gbkey=CDS]	385	75423	14	14	7	7	15.2	5.35	0.31
8	lcl|CP068048.1_prot_QQR41662.1_4171	[locus_tag=JKA73_21145] [protein=hypothetical protein] [protein_id=QQR41662.1] [location=complement(5234580..5236382)] [gbkey=CDS]	350	65299	15	15	3	3	6	6.9	0.12
9	lcl|CP068048.1_prot_QQR47870.1_3599	[locus_tag=JKA73_18260] [protein=metallophosphoesterase] [protein_id=QQR47870.1] [location=complement(4301090..4302550)] [gbkey=CDS]	341	53454	6	6	1	1	2.9	6.08	0.1
10	lcl|CP068048.1_prot_QQR48155.1_2053	[locus_tag=JKA73_10425] [protein=hypothetical protein] [protein_id=QQR48155.1] [location=2490070..2490573] [gbkey=CDS]	335	17616	6	6	3	3	25.1	5.8	0.73
11	lcl|CP068048.1_prot_QQR48356.1_5257	[locus_tag=JKA73_26645] [protein=hypothetical protein] [protein_id=QQR48356.1] [location=complement(6682788..6683849)] [gbkey=CDS]	326	37728	7	7	4	4	12.5	5.13	0.3
12	lcl|CP068048.1_prot_QQR44419.1_7239	[locus_tag=JKA73_36585] [protein=porin family protein] [protein_id=QQR44419.1] [location=9036232..9036948] [gbkey=CDS]	322	25795	5	5	2	2	16.4	4.74	0.33
13	lcl|CP068048.1_prot_QQR45406.1_890	[locus_tag=JKA73_04510] [protein=outer membrane beta-barrel protein] [protein_id=QQR45406.1] [location=complement(1060351..1060986)] [gbkey=CDS]	316	22449	12	12	4	4	18	4.59	0.73
14	lcl|CP068048.1_prot_QQR43909.1_6661	[locus_tag=JKA73_33695] [protein=hypothetical protein] [protein_id=QQR43909.1] [location=complement(8367209..8368666)] [gbkey=CDS]	249	54158	4	4	3	3	13.8	5.64	0.2
15	lcl|CP068048.1_prot_QQR45714.1_1221	[locus_tag=JKA73_06165] [protein=TonB-dependent receptor] [protein_id=QQR45714.1] [location=1475055..1477070] [gbkey=CDS]	235	72305	5	5	5	5	9.7	5.25	0.19
16	lcl|CP068048.1_prot_QQR45316.1_796	[locus_tag=JKA73_04040] [protein=TonB family protein] [protein_id=QQR45316.1] [location=946393..949155] [gbkey=CDS]	228	99578	8	8	5	5	5.9	5.02	0.14
17	lcl|CP068048.1_prot_QQR43216.1_5888	[locus_tag=JKA73_29825] [protein=M48 family metalloprotease] [protein_id=QQR43216.1] [location=7449308..7450132] [gbkey=CDS]	216	29212	5	5	3	3	10.2	9.18	0.29
18	lcl|CP068048.1_prot_QQR43143.1_5812	[locus_tag=JKA73_29445] [protein=hypothetical protein] [protein_id=QQR43143.1] [location=7359547..7360704] [gbkey=CDS]	210	42597	3	3	1	1	3.9	6.72	0.06
19	lcl|CP068048.1_prot_QQR42309.1_4874	[locus_tag=JKA73_24715] [protein=hypothetical protein] [protein_id=QQR42309.1] [location=6220521..6221714] [gbkey=CDS]	209	42952	5	5	3	3	9.1	5.47	0.26
20	lcl|CP068048.1_prot_QQR45417.1_902	[locus_tag=JKA73_04570] [protein=glutaminyl-peptide cyclotransferase] [protein_id=QQR45417.1] [location=1079196..1079996] [gbkey=CDS]	177	29196	3	3	1	1	5.6	5.62	0.09
21	lcl|CP068048.1_prot_QQR47958.1_3700	[locus_tag=JKA73_18775] [protein=DUF4382 domain-containing protein] [protein_id=QQR47958.1] [location=complement(4516975..4517904)] [gbkey=CDS]	162	32287	2	2	1	1	5.5	4.53	0.08
22	lcl|CP068048.1_prot_QQR48476.1_6923	[locus_tag=JKA73_35005] [protein=transporter] [protein_id=QQR48476.1] [location=8668794..8669717] [gbkey=CDS]	161	32895	4	4	2	2	9.4	7.82	0.25
23	lcl|CP068048.1_prot_QQR44831.1_272	[locus_tag=JKA73_01365] [protein=PD40 domain-containing protein] [protein_id=QQR44831.1] [location=329243..330205] [gbkey=CDS]	150	32701	2	2	2	2	10.9	5.85	0.16
24	lcl|CP068048.1_prot_QQR44006.1_6772	[locus_tag=JKA73_34250] [protein=hypothetical protein] [protein_id=QQR44006.1] [location=8498630..8499343] [gbkey=CDS]	144	24712	2	2	1	1	8	5.12	0.22
25	lcl|CP068048.1_prot_QQR48166.1_2241	[locus_tag=JKA73_11365] [protein=BamA/TamA family outer membrane protein] [protein_id=QQR48166.1] [location=complement(2702545..2704026)] [gbkey=CDS]	143	54367	4	4	3	3	5.1	7.77	0.15
26	lcl|CP068048.1_prot_QQR43214.1_5886	[locus_tag=JKA73_29815] [protein=TIGR04551 family protein] [protein_id=QQR43214.1] [location=complement(7446361..7448154)] [gbkey=CDS]	143	66157	5	5	3	3	6	4.75	0.12
27	lcl|CP068048.1_prot_QQR43869.1_6617	[locus_tag=JKA73_33475] [protein=putative metal-binding motif-containing protein] [protein_id=QQR43869.1] [location=8314736..8316796] [gbkey=CDS]	143	72536	3	3	2	2	4.4	4.35	0.07
28	lcl|CP068048.1_prot_QQR41752.1_4269	[locus_tag=JKA73_21635] [protein=serpin family protein] [protein_id=QQR41752.1] [location=5348859..5350169] [gbkey=CDS]	140	47646	7	7	6	6	15.4	5.23	0.37
29	lcl|CP068048.1_prot_QQR44934.1_377	[locus_tag=JKA73_01935] [protein=hypothetical protein] [protein_id=QQR44934.1] [location=455161..456513] [gbkey=CDS]	138	47973	4	4	3	3	8	6.02	0.17
30	lcl|CP068048.1_prot_QQR46044.1_1570	[locus_tag=JKA73_07940] [protein=trypsin-like serine protease] [protein_id=QQR46044.1] [location=1917705..1918838] [gbkey=CDS]	135	39382	2	2	1	1	4.8	5.5	0.07
31	lcl|CP068048.1_prot_QQR48052.1_228	[locus_tag=JKA73_01140] [protein=peptidase] [protein_id=QQR48052.1] [location=279849..280457] [gbkey=CDS]	123	21987	2	2	1	1	7.4	6.19	0.12
32	lcl|CP068048.1_prot_QQR48442.1_6540	[locus_tag=JKA73_33090] [protein=hypothetical protein] [protein_id=QQR48442.1] [location=complement(8226929..8228230)] [gbkey=CDS]	121	44741	1	1	1	1	3.9	3.92	0.06
33	lcl|CP068048.1_prot_QQR47148.1_2815	[locus_tag=JKA73_14270] [protein=hypothetical protein] [protein_id=QQR47148.1] [location=complement(3416330..3417751)] [gbkey=CDS]	120	51290	2	2	2	2	5.7	6.64	0.1
34	lcl|CP068048.1_prot_QQR45828.1_1341	[locus_tag=JKA73_06765] [protein=hypothetical protein] [protein_id=QQR45828.1] [location=complement(1626483..1627331)] [gbkey=CDS]	118	29881	2	2	2	2	10.3	8.65	0.18
35	lcl|CP068048.1_prot_QQR44776.1_210	[locus_tag=JKA73_01050] [protein=hypothetical protein] [protein_id=QQR44776.1] [location=260133..261956] [gbkey=CDS]	112	66256	2	2	2	2	6.1	9.28	0.08
36	lcl|CP068048.1_prot_QQR46931.1_2573	[locus_tag=JKA73_13025] [protein=hypothetical protein] [protein_id=QQR46931.1] [location=complement(3111632..3113167)] [gbkey=CDS]	108	55710	5	5	3	3	8.8	5.49	0.2
37	lcl|CP068048.1_prot_QQR45449.1_940	[locus_tag=JKA73_04760] [protein=metallo-mystery pair system four-Cys motif protein] [protein_id=QQR45449.1] [location=1131938..1132873] [gbkey=CDS]	98	33498	2	2	1	1	5.8	5.12	0.08
38	lcl|CP068048.1_prot_QQR46768.1_2398	[locus_tag=JKA73_12150] [protein=PEGA domain-containing protein] [protein_id=QQR46768.1] [location=complement(2900472..2901974)] [gbkey=CDS]	86	51748	3	3	2	2	5.8	6.96	0.1
39	lcl|CP068048.1_prot_QQR45080.1_539	[locus_tag=JKA73_02750] [protein=porin] [protein_id=QQR45080.1] [location=643468..644802] [gbkey=CDS]	85	49618	2	2	1	1	2.7	6.95	0.05
40	lcl|CP068048.1_prot_QQR45726.1_1233	[locus_tag=JKA73_06225] [protein=outer membrane beta-barrel domain-containing protein] [protein_id=QQR45726.1] [location=complement(1491234..1491869)] [gbkey=CDS]	85	23212	2	2	1	1	6.6	9.3	0.11
41	lcl|CP068048.1_prot_QQR45170.1_638	[locus_tag=JKA73_03245] [protein=hypothetical protein] [protein_id=QQR45170.1] [location=765267..765791] [gbkey=CDS]	80	18701	3	3	2	2	18.4	8.78	0.3
42	lcl|CP068048.1_prot_QQR47020.1_2672	[locus_tag=JKA73_13530] [protein=M20/M25/M40 family metallo-hydrolase] [protein_id=QQR47020.1] [location=3223791..3225833] [gbkey=CDS]	77	71833	2	2	1	1	2.2	5.34	0.04
43	lcl|CP068048.1_prot_QQR42724.1_5348	[locus_tag=JKA73_27120] [protein=hypothetical protein] [protein_id=QQR42724.1] [location=6800908..6802338] [gbkey=CDS]	73	52165	4	4	3	3	4.8	5.52	0.16
44	lcl|CP068048.1_prot_QQR43607.1_6334	[locus_tag=JKA73_32060] [protein=hypothetical protein] [protein_id=QQR43607.1] [location=7978637..7979263] [gbkey=CDS]	72	22057	1	1	1	1	9.6	6.16	0.12
45	lcl|CP068048.1_prot_QQR41868.1_4393	[locus_tag=JKA73_22260] [protein=hypothetical protein] [protein_id=QQR41868.1] [location=complement(5514296..5514901)] [gbkey=CDS]	72	21874	1	1	1	1	9	9.47	0.12
46	lcl|CP068048.1_prot_QQR42280.1_4841	[gene=cglE] [locus_tag=JKA73_24550] [protein=adventurous gliding motility protein CglE] [protein_id=QQR42280.1] [location=complement(6185179..6185808)] [gbkey=CDS]	71	22051	1	1	1	1	9.6	6.1	0.12
47	lcl|CP068048.1_prot_QQR42242.1_4798	[locus_tag=JKA73_24330] [protein=glycoside hydrolase family 16 protein] [protein_id=QQR42242.1] [location=complement(6113095..6114462)] [gbkey=CDS]	70	50494	2	2	1	1	1.8	5.88	0.05
48	lcl|CP068048.1_prot_QQR44187.1_6976	[locus_tag=JKA73_35270] [protein=hypothetical protein] [protein_id=QQR44187.1] [location=8741207..8742070] [gbkey=CDS]	69	30518	2	2	2	2	10.8	6.13	0.18
49	lcl|CP068048.1_prot_QQR41978.1_4517	[locus_tag=JKA73_22890] [protein=RICIN domain-containing protein] [protein_id=QQR41978.1] [location=5737768..5738985] [gbkey=CDS]	67	43699	1	1	1	1	3.2	5.79	0.06
50	lcl|CP068048.1_prot_QQR45097.1_559	[locus_tag=JKA73_02850] [protein=trypsin-like serine protease] [protein_id=QQR45097.1] [location=671833..673152] [gbkey=CDS]	66	47010	5	5	2	2	3.6	5.68	0.11
51	lcl|CP068048.1_prot_QQR44440.1_7261	[locus_tag=JKA73_36695] [protein=hypothetical protein] [protein_id=QQR44440.1] [location=complement(9059543..9059986)] [gbkey=CDS]	63	15473	1	1	1	1	13.6	6.56	0.17
52	lcl|CP068048.1_prot_QQR43356.1_6045	[locus_tag=JKA73_30610] [protein=DUF481 domain-containing protein] [protein_id=QQR43356.1] [location=complement(7631505..7632497)] [gbkey=CDS]	63	34839	1	1	1	1	3.6	5.31	0.07
53	lcl|CP068048.1_prot_QQR48423.1_6230	[locus_tag=JKA73_31535] [protein=OmpA family protein] [protein_id=QQR48423.1] [location=7852771..7854360] [gbkey=CDS]	63	56111	2	2	2	2	5.5	4.91	0.09
54	lcl|CP068048.1_prot_QQR46076.1_1607	[locus_tag=JKA73_08125] [protein=hypothetical protein] [protein_id=QQR46076.1] [location=1964373..1965641] [gbkey=CDS]	62	44877	1	1	1	1	3.6	4.75	0.06
55	lcl|CP068048.1_prot_QQR46977.1_2624	[locus_tag=JKA73_13290] [protein=hypothetical protein] [protein_id=QQR46977.1] [location=3172386..3173924] [gbkey=CDS]	62	54776	1	1	1	1	3.7	4.66	0.05
56	lcl|CP068048.1_prot_QQR48178.1_2455	[gene=gltC] [locus_tag=JKA73_12435] [protein=adventurous gliding motility protein GltC] [protein_id=QQR48178.1] [location=2965279..2967300] [gbkey=CDS]	61	76047	3	3	2	2	3	8.74	0.11
57	lcl|CP068048.1_prot_QQR48316.1_4899	[locus_tag=JKA73_24845] [protein=hypothetical protein] [protein_id=QQR48316.1] [location=6257760..6258767] [gbkey=CDS]	61	35820	6	6	2	2	3	4.83	0.23
58	lcl|CP068048.1_prot_QQR44491.1_7320	[locus_tag=JKA73_37015] [protein=hypothetical protein] [protein_id=QQR44491.1] [location=complement(9130476..9131033)] [gbkey=CDS]	59	19190	3	3	1	1	5.9	4.94	0.13
59	lcl|CP068048.1_prot_QQR43055.1_5718	[gene=pilQ] [locus_tag=JKA73_28975] [protein=type IV pilus secretin PilQ] [protein_id=QQR43055.1] [location=complement(7232985..7235699)] [gbkey=CDS]	57	95659	2	2	2	2	2.8	9.35	0.05
60	lcl|CP068048.1_prot_QQR45317.1_797	[locus_tag=JKA73_04045] [protein=hypothetical protein] [protein_id=QQR45317.1] [location=949157..950077] [gbkey=CDS]	57	33440	1	1	1	1	4.9	4.54	0.08
61	lcl|CP068048.1_prot_QQR43616.1_6343	[locus_tag=JKA73_32105] [protein=hypothetical protein] [protein_id=QQR43616.1] [location=complement(7987127..7989172)] [gbkey=CDS]	54	73262	2	2	2	2	5.3	4.69	0.07
62	lcl|CP068048.1_prot_QQR42571.1_5164	[locus_tag=JKA73_26175] [protein=OmpA family protein] [protein_id=QQR42571.1] [location=6576042..6577451] [gbkey=CDS]	53	51505	1	1	1	1	2.6	4.33	0.05
63	lcl|CP068048.1_prot_QQR43854.1_6600	[locus_tag=JKA73_33390] [protein=hypothetical protein] [protein_id=QQR43854.1] [location=complement(8299327..8300373)] [gbkey=CDS]	52	37848	1	1	1	1	5.7	4.67	0.07
64	lcl|CP068048.1_prot_QQR48352.1_5232	[locus_tag=JKA73_26520] [protein=DUF1929 domain-containing protein] [protein_id=QQR48352.1] [location=6650685..6653237] [gbkey=CDS]	50	92698	2	2	1	1	0.9	5.97	0.03
65	lcl|CP068048.1_prot_QQR41882.1_4413	[locus_tag=JKA73_22365] [protein=hypothetical protein] [protein_id=QQR41882.1] [location=complement(5559048..5559578)] [gbkey=CDS]	46	19700	1	1	1	1	5.7	4.93	0.13
66	lcl|CP068048.1_prot_QQR48034.1_3780	[locus_tag=JKA73_19190] [protein=hypothetical protein] [protein_id=QQR48034.1] [location=4609718..4610365] [gbkey=CDS]	45	24016	1	1	1	1	8.8	5.09	0.11
67	lcl|CP068048.1_prot_QQR41346.1_3835	[locus_tag=JKA73_19465] [protein=hypothetical protein] [protein_id=QQR41346.1] [location=4715286..4716263] [gbkey=CDS]	45	35861	1	1	1	1	2.2	5.84	0.07
68	lcl|CP068048.1_prot_QQR47172.1_2839	[locus_tag=JKA73_14390] [protein=glycosyl hydrolase] [protein_id=QQR47172.1] [location=3458837..3460636] [gbkey=CDS]	42	63968	2	2	1	1	2.3	5.36	0.04
69	lcl|CP068048.1_prot_QQR46495.1_2105	[locus_tag=JKA73_10685] [protein=multidrug transporter] [protein_id=QQR46495.1] [location=complement(2550533..2552497)] [gbkey=CDS]	41	70875	1	1	1	1	3.2	4.32	0.04
70	lcl|CP068048.1_prot_QQR47784.1_3506	[locus_tag=JKA73_17775] [protein=amidohydrolase family protein] [protein_id=QQR47784.1] [location=complement(4192431..4194128)] [gbkey=CDS]	41	60936	1	1	1	1	1.6	5.72	0.04
71	lcl|CP068048.1_prot_QQR43247.1_5926	[locus_tag=JKA73_30015] [protein=S8 family serine peptidase] [protein_id=QQR43247.1] [location=7486930..7489236] [gbkey=CDS]	41	82417	2	2	1	1	1.2	6.43	0.03
72	lcl|CP068048.1_prot_QQR42277.1_4838	[locus_tag=JKA73_24535] [protein=tetratricopeptide repeat protein] [protein_id=QQR42277.1] [location=complement(6170858..6183139)] [gbkey=CDS]	40	453120	2	2	1	1	0.2	5.26	0.01
73	lcl|CP068048.1_prot_QQR46461.1_2064	[locus_tag=JKA73_10480] [protein=hypothetical protein] [protein_id=QQR46461.1] [location=2500642..2502159] [gbkey=CDS]	39	53737	1	1	1	1	2.2	4.72	0.05
74	lcl|CP068048.1_prot_QQR41525.1_4025	[locus_tag=JKA73_20415] [protein=hypothetical protein] [protein_id=QQR41525.1] [location=complement(5038396..5039118)] [gbkey=CDS]	39	25568	1	1	1	1	6.3	7.98	0.1
75	lcl|CP068048.1_prot_QQR47122.1_2788	[locus_tag=JKA73_14135] [protein=endopeptidase] [protein_id=QQR47122.1] [location=complement(3375101..3378673)] [gbkey=CDS]	39	126462	1	1	1	1	0.8	5.12	0.02
76	lcl|CP068048.1_prot_QQR42761.1_5394	[locus_tag=JKA73_27350] [protein=M4 family metallopeptidase] [protein_id=QQR42761.1] [location=6860111..6861553] [gbkey=CDS]	39	51634	2	2	2	2	5.2	5.66	0.1
77	lcl|CP068048.1_prot_QQR48471.1_6890	[locus_tag=JKA73_34840] [protein=helix-turn-helix transcriptional regulator] [protein_id=QQR48471.1] [location=complement(8630368..8630736)] [gbkey=CDS]	34	13844	1	1	1	1	4.1	10.29	0.19
78	lcl|CP068048.1_prot_1683	[locus_tag=JKA73_08505] [protein=ATP-binding protein] [pseudo=true] [location=complement(2065676..2066019)] [gbkey=CDS]	33	12360	2	2	1	1	9.6	8.56	0.21
79	lcl|CP068048.1_prot_QQR45324.1_805	[locus_tag=JKA73_04085] [protein=saccharopine dehydrogenase NADP-binding domain-containing protein] [protein_id=QQR45324.1] [location=958508..959599] [gbkey=CDS]	33	38827	4	4	1	1	3.9	6.95	0.07
80	lcl|CP068048.1_prot_QQR47330.1_3007	[locus_tag=JKA73_15265] [protein=pilus assembly protein N-terminal domain-containing protein] [protein_id=QQR47330.1] [location=3662115..3663563] [gbkey=CDS]	32	51907	1	1	1	1	1.9	9.12	0.05
81	lcl|CP068048.1_prot_QQR47038.1_2691	[locus_tag=JKA73_13625] [protein=HAMP domain-containing histidine kinase] [protein_id=QQR47038.1] [location=complement(3241453..3243282)] [gbkey=CDS]	30	67302	3	3	2	2	3.3	7.22	0.08
82	lcl|CP068048.1_prot_QQR46818.1_2453	[locus_tag=JKA73_12425] [protein=outer membrane beta-barrel domain-containing protein] [protein_id=QQR46818.1] [location=2963685..2964512] [gbkey=CDS]	29	29574	1	1	1	1	4.7	4.88	0.09
83	lcl|CP068048.1_prot_QQR45678.1_1183	[locus_tag=JKA73_05975] [protein=hypothetical protein] [protein_id=QQR45678.1] [location=1435887..1436165] [gbkey=CDS]	27	10945	1	1	1	1	6.5	10.19	0.24
84	lcl|CP068048.1_prot_QQR42623.1_5236	[locus_tag=JKA73_26540] [protein=ferritin-like domain-containing protein] [protein_id=QQR42623.1] [location=complement(6656816..6657994)] [gbkey=CDS]	27	41834	2	2	2	2	4.3	9.94	0.13
85	lcl|CP068048.1_prot_QQR46794.1_2426	[gene=gspF] [locus_tag=JKA73_12290] [protein=type II secretion system inner membrane protein GspF] [protein_id=QQR46794.1] [location=complement(2929449..2930705)] [gbkey=CDS]	27	45540	3	3	1	1	3.1	9.89	0.06
86	lcl|CP068048.1_prot_QQR42840.1_5489	[locus_tag=JKA73_27825] [protein=c-type cytochrome] [protein_id=QQR42840.1] [location=complement(6977781..6978332)] [gbkey=CDS]	27	19659	1	1	1	1	8.7	5.25	0.13
87	lcl|CP068048.1_prot_QQR47847.1_3573	[gene=rplS] [locus_tag=JKA73_18115] [protein=50S ribosomal protein L19] [protein_id=QQR47847.1] [location=4261431..4261814] [gbkey=CDS]	26	14549	1	1	1	1	8.7	10.42	0.18
88	lcl|CP068048.1_prot_QQR42429.1_5006	[locus_tag=JKA73_25385] [protein=protein kinase] [protein_id=QQR42429.1] [location=6393575..6397246] [gbkey=CDS]	26	136433	2	2	1	1	0.8	6.2	0.02
89	lcl|CP068048.1_prot_QQR45342.1_823	[locus_tag=JKA73_04175] [protein=TonB-dependent receptor] [protein_id=QQR45342.1] [location=979719..982334] [gbkey=CDS]	26	95339	1	1	1	1	1	5.25	0.03
90	lcl|CP068048.1_prot_QQR48441.1_6509	[locus_tag=JKA73_32935] [protein=hypothetical protein] [protein_id=QQR48441.1] [location=8187666..8188388] [gbkey=CDS]	26	26929	1	1	1	1	5	10.38	0.1
91	lcl|CP068048.1_prot_QQR47270.1_2944	[locus_tag=JKA73_14920] [protein=two-component sensor histidine kinase] [protein_id=QQR47270.1] [location=3584752..3586275] [gbkey=CDS]	25	56075	3	3	1	1	3.2	7.3	0.05
92	lcl|CP068048.1_prot_QQR44337.1_7142	[locus_tag=JKA73_36100] [protein=Ig-like domain-containing protein] [protein_id=QQR44337.1] [location=8921096..8923054] [gbkey=CDS]	25	67487	1	1	1	1	2.9	4.26	0.04
93	lcl|CP068048.1_prot_QQR47436.1_3130	[locus_tag=JKA73_15890] [protein=protein kinase] [protein_id=QQR47436.1] [location=3801776..3803494] [gbkey=CDS]	25	62161	1	1	1	1	1.4	6.89	0.04
94	lcl|CP068048.1_prot_QQR41772.1_4292	[locus_tag=JKA73_21750] [protein=amino acid adenylation domain-containing protein] [protein_id=QQR41772.1] [location=complement(5389203..5398124)] [gbkey=CDS]	25	325125	1	1	1	1	0.3	5.9	0.01
95	lcl|CP068048.1_prot_QQR48203.1_2845	[locus_tag=JKA73_14420] [protein=hypothetical protein] [protein_id=QQR48203.1] [location=3466410..3467714] [gbkey=CDS]	24	46945	1	1	1	1	2.3	5.04	0.05
96	lcl|CP068048.1_prot_QQR44259.1_7058	[locus_tag=JKA73_35680] [protein=ABC transporter substrate-binding protein] [protein_id=QQR44259.1] [location=8821463..8822509] [gbkey=CDS]	24	36887	1	1	1	1	3.2	7.82	0.07
97	lcl|CP068048.1_prot_QQR46194.1_1751	[locus_tag=JKA73_08845] [protein=RsbRD N-terminal domain-containing protein] [protein_id=QQR46194.1] [location=complement(2134259..2135914)] [gbkey=CDS]	24	60638	1	1	1	1	1.5	6.2	0.04
98	lcl|CP068048.1_prot_QQR46590.1_2209	[locus_tag=JKA73_11205] [protein=DUF4215 domain-containing protein] [protein_id=QQR46590.1] [location=2663099..2664850] [gbkey=CDS]	24	63984	2	2	1	1	1.4	4.27	0.04
99	lcl|CP068048.1_prot_QQR45192.1_661	[locus_tag=JKA73_03360] [protein=iron chelate uptake ABC transporter family permease subunit] [protein_id=QQR45192.1] [location=complement(785476..786444)] [gbkey=CDS]	23	35060	1	1	1	1	2.8	9.18	0.07
100	lcl|CP068048.1_prot_QQR48162.1_2120	[locus_tag=JKA73_10760] [protein=ABC transporter permease] [protein_id=QQR48162.1] [location=2578596..2581025] [gbkey=CDS]	23	84890	1	1	1	1	1.2	9.75	0.03
101	lcl|CP068048.1_prot_QQR47798.1_3520	[locus_tag=JKA73_17850] [protein=cell wall protein] [protein_id=QQR47798.1] [location=complement(4203825..4204478)] [gbkey=CDS]	23	23715	1	1	1	1	3.2	8.54	0.11
102	lcl|CP068048.1_prot_QQR47643.1_3356	[locus_tag=JKA73_17020] [protein=tetratricopeptide repeat protein] [protein_id=QQR47643.1] [location=complement(4040665..4045743)] [gbkey=CDS]	23	186727	2	2	2	2	0.7	5.84	0.03
103	lcl|CP068048.1_prot_QQR47248.1_2920	[gene=hslV] [locus_tag=JKA73_14800] [protein=ATP-dependent protease subunit HslV] [protein_id=QQR47248.1] [location=3560705..3561232] [gbkey=CDS]	23	19162	1	1	1	1	4	7.79	0.13
104	lcl|CP068048.1_prot_QQR43972.1_6735	[locus_tag=JKA73_34065] [protein=cation:proton antiporter] [protein_id=QQR43972.1] [location=complement(8452125..8454224)] [gbkey=CDS]	23	73144	1	1	1	1	1.1	9.05	0.04
105	lcl|CP068048.1_prot_QQR42973.1_5633	[locus_tag=JKA73_28545] [protein=hypothetical protein] [protein_id=QQR42973.1] [location=complement(7135283..7135849)] [gbkey=CDS]	23	19852	1	1	1	1	6.9	8.82	0.13
106	lcl|CP068048.1_prot_QQR43198.1_5870	[locus_tag=JKA73_29735] [protein=MBL fold nuclease] [protein_id=QQR43198.1] [location=complement(7431383..7432360)] [gbkey=CDS]	22	35738	3	3	1	1	2.5	7.82	0.07
107	lcl|CP068048.1_prot_QQR41420.1_3913	[locus_tag=JKA73_19855] [protein=MCE family protein] [protein_id=QQR41420.1] [location=4814151..4815161] [gbkey=CDS]	22	35491	1	1	1	1	3	5.41	0.07
108	lcl|CP068048.1_prot_QQR44196.1_6986	[locus_tag=JKA73_35320] [protein=cyclic nucleotide-binding domain-containing protein] [protein_id=QQR44196.1] [location=complement(8752346..8753656)] [gbkey=CDS]	22	46592	1	1	1	1	2.1	6.19	0.06
109	lcl|CP068048.1_prot_QQR43470.1_6179	[locus_tag=JKA73_31280] [protein=L-serine ammonia-lyase] [protein_id=QQR43470.1] [location=7788315..7789730] [gbkey=CDS]	22	50456	1	1	1	1	1.5	6.81	0.05
110	lcl|CP068048.1_prot_QQR42284.1_4845	[locus_tag=JKA73_24570] [protein=tetratricopeptide repeat protein] [protein_id=QQR42284.1] [location=complement(6189747..6193322)] [gbkey=CDS]	22	134903	2	2	1	1	0.7	8.46	0.02
111	lcl|CP068048.1_prot_QQR45151.1_617	[locus_tag=JKA73_03140] [protein=ferritin-like domain-containing protein] [protein_id=QQR45151.1] [location=742172..742945] [gbkey=CDS]	22	27627	1	1	1	1	3.5	5.25	0.09
112	lcl|CP068048.1_prot_QQR43432.1_6132	[locus_tag=JKA73_31045] [protein=FAD-binding protein] [protein_id=QQR43432.1] [location=7739328..7740776] [gbkey=CDS]	22	53355	1	1	1	1	2.9	7.94	0.05
113	lcl|CP068048.1_prot_QQR47905.1_3642	[locus_tag=JKA73_18485] [protein=non-ribosomal peptide synthase/polyketide synthase] [protein_id=QQR47905.1] [location=4404437..4440256] [gbkey=CDS]	22	1303959	1	1	1	1	0.1	5.45	0
114	lcl|CP068048.1_prot_QQR42316.1_4881	[gene=murA] [locus_tag=JKA73_24750] [protein=UDP-N-acetylglucosamine 1-carboxyvinyltransferase] [protein_id=QQR42316.1] [location=6231816..6233078] [gbkey=CDS]	21	44698	1	1	1	1	2.1	6.81	0.06
115	lcl|CP068048.1_prot_QQR42002.1_4541	[locus_tag=JKA73_23010] [protein=serine/threonine protein kinase] [protein_id=QQR42002.1] [location=complement(5766571..5769717)] [gbkey=CDS]	21	111418	1	1	1	1	0.9	7.38	0.02
116	lcl|CP068048.1_prot_QQR43729.1_6466	[locus_tag=JKA73_32720] [protein=phosphomannomutase/phosphoglucomutase] [protein_id=QQR43729.1] [location=complement(8139084..8140454)] [gbkey=CDS]	21	50507	1	1	1	1	2.2	5.75	0.05
117	lcl|CP068048.1_prot_5892	[locus_tag=JKA73_29845] [protein=ATP-grasp domain-containing protein] [pseudo=true] [location=complement(7453134..7453977)] [gbkey=CDS]	20	31555	1	1	1	1	3.2	10.08	0.08
118	lcl|CP068048.1_prot_QQR44434.1_7255	[locus_tag=JKA73_36665] [protein=hypothetical protein] [protein_id=QQR44434.1] [location=9055718..9056557] [gbkey=CDS]	20	30082	1	1	1	1	3.2	4.53	0.09
119	lcl|CP068048.1_prot_QQR42329.1_4900	[locus_tag=JKA73_24850] [protein=esterase] [protein_id=QQR42329.1] [location=complement(6258910..6259911)] [gbkey=CDS]	20	36269	1	1	1	1	3	6.34	0.07
120	lcl|CP068048.1_prot_QQR42369.1_4941	[locus_tag=JKA73_25055] [protein=response regulator] [protein_id=QQR42369.1] [location=complement(6309080..6310339)] [gbkey=CDS]	20	44172	1	1	1	1	1.7	5.07	0.06
121	lcl|CP068048.1_prot_2076	[locus_tag=JKA73_10540] [protein=lipase] [pseudo=true] [location=complement(2512505..2513828)] [gbkey=CDS]	20	48650	1	1	1	1	1.6	11.93	0.05
122	lcl|CP068048.1_prot_QQR41468.1_3965	[locus_tag=JKA73_20115] [protein=FAD-dependent oxidoreductase] [protein_id=QQR41468.1] [location=4936517..4938034] [gbkey=CDS]	20	55163	2	2	1	1	2	7.98	0.05
123	lcl|CP068048.1_prot_QQR46201.1_1758	[locus_tag=JKA73_08880] [protein=PD-(D/E)XK nuclease family protein] [protein_id=QQR46201.1] [location=complement(2142333..2143508)] [gbkey=CDS]	20	44824	1	1	1	1	1.5	6.21	0.06
124	lcl|CP068048.1_prot_QQR46233.1_1797	[locus_tag=JKA73_09080] [protein=hypothetical protein] [protein_id=QQR46233.1] [location=complement(2190466..2191731)] [gbkey=CDS]	20	44542	1	1	1	1	4	8.72	0.06
125	lcl|CP068048.1_prot_QQR42038.1_4582	[locus_tag=JKA73_23215] [protein=PhpK family radical SAM P-methyltransferase] [protein_id=QQR42038.1] [location=5837398..5839074] [gbkey=CDS]	19	63602	1	1	1	1	2.3	5.57	0.04
126	lcl|CP068048.1_prot_QQR42525.1_5111	[locus_tag=JKA73_25910] [protein=chemotaxis protein CheR] [protein_id=QQR42525.1] [location=complement(6513632..6514954)] [gbkey=CDS]	19	48017	2	2	1	1	1.8	8.66	0.05
127	lcl|CP068048.1_prot_QQR43947.1_6705	[locus_tag=JKA73_33915] [protein=hypothetical protein] [protein_id=QQR43947.1] [location=8423436..8424329] [gbkey=CDS]	19	33373	1	1	1	1	4.4	5.2	0.08
128	lcl|CP068048.1_prot_QQR47975.1_3717	[locus_tag=JKA73_18860] [protein=HAD-IG family 5~-nucleotidase] [protein_id=QQR47975.1] [location=complement(4535853..4537562)] [gbkey=CDS]	19	65313	1	1	1	1	2.3	6.12	0.04
129	lcl|CP068048.1_prot_QQR43516.1_6229	[locus_tag=JKA73_31530] [protein=HYR domain-containing protein] [protein_id=QQR43516.1] [location=7848895..7852767] [gbkey=CDS]	19	132714	1	1	1	1	0.9	5.12	0.02
130	lcl|CP068048.1_prot_QQR46347.1_1921	[locus_tag=JKA73_09760] [protein=stringent starvation protein B] [protein_id=QQR46347.1] [location=2333227..2333745] [gbkey=CDS]	19	19214	1	1	1	1	8.1	6.92	0.13
131	lcl|CP068048.1_prot_QQR45089.1_550	[locus_tag=JKA73_02805] [protein=arsenate reductase ArsC] [protein_id=QQR45089.1] [location=658038..658445] [gbkey=CDS]	19	15103	1	1	1	1	8.1	5.34	0.17
132	lcl|CP068048.1_prot_QQR45359.1_841	[locus_tag=JKA73_04265] [protein=hypothetical protein] [protein_id=QQR45359.1] [location=complement(1000334..1000927)] [gbkey=CDS]	19	21154	1	1	1	1	4.6	9.04	0.12
133	lcl|CP068048.1_prot_4434	[locus_tag=JKA73_22470] [protein=PD40 domain-containing protein] [pseudo=true] [location=complement(5585050..5586847)] [gbkey=CDS]	19	64413	1	1	1	1	1.3	11.98	0.04
134	lcl|CP068048.1_prot_QQR47421.1_3115	[gene=greB] [locus_tag=JKA73_15815] [protein=transcription elongation factor GreB] [protein_id=QQR47421.1] [location=3784902..3785432] [gbkey=CDS]	18	19887	1	1	1	1	6.8	5.29	0.13
135	lcl|CP068048.1_prot_QQR46676.1_2301	[locus_tag=JKA73_11665] [protein=PAS domain S-box protein] [protein_id=QQR46676.1] [location=complement(2774451..2776742)] [gbkey=CDS]	18	83436	1	1	1	1	1.3	5.96	0.03
136	lcl|CP068048.1_prot_QQR46427.1_2020	[locus_tag=JKA73_10260] [protein=sigma 54-interacting transcriptional regulator] [protein_id=QQR46427.1] [location=complement(2452688..2454433)] [gbkey=CDS]	18	62692	1	1	1	1	1.9	8.62	0.04
137	lcl|CP068048.1_prot_QQR45287.1_765	[locus_tag=JKA73_03885] [protein=hypothetical protein] [protein_id=QQR45287.1] [location=910878..911423] [gbkey=CDS]	18	20620	1	1	1	1	8.3	6.31	0.13
138	lcl|CP068048.1_prot_QQR42249.1_4806	[locus_tag=JKA73_24370] [protein=superoxide dismutase] [protein_id=QQR42249.1] [location=complement(6127911..6128492)] [gbkey=CDS]	18	21715	1	1	1	1	5.7	6.3	0.12
139	lcl|CP068048.1_prot_QQR43218.1_5893	[locus_tag=JKA73_29850] [protein=trypsin-like peptidase domain-containing protein] [protein_id=QQR43218.1] [location=complement(7454152..7455531)] [gbkey=CDS]	18	49230	1	1	1	1	2.6	6.06	0.05
140	lcl|CP068048.1_prot_QQR43528.1_6243	[locus_tag=JKA73_31600] [protein=gliding motility protein] [protein_id=QQR43528.1] [location=7868152..7870062] [gbkey=CDS]	18	71566	1	1	1	1	2	9.52	0.04
141	lcl|CP068048.1_prot_QQR44267.1_7066	[locus_tag=JKA73_35720] [protein=trypsin-like serine protease] [protein_id=QQR44267.1] [location=8830927..8832174] [gbkey=CDS]	18	45169	2	2	2	2	6.5	5.54	0.12
142	lcl|CP068048.1_prot_QQR43751.1_6488	[locus_tag=JKA73_32830] [protein=MXAN_6521/LA_1396 family lipoprotein] [protein_id=QQR43751.1] [location=8172200..8172796] [gbkey=CDS]	18	21874	1	1	1	1	7.6	4.85	0.12
143	lcl|CP068048.1_prot_QQR42064.1_4609	[gene=pgsA] [locus_tag=JKA73_23360] [protein=CDP-diacylglycerol--glycerol-3-phosphate 3-phosphatidyltransferase] [protein_id=QQR42064.1] [location=complement(5890985..5891674)] [gbkey=CDS]	17	25295	1	1	1	1	3.5	9.94	0.1
144	lcl|CP068048.1_prot_QQR48350.1_5223	[locus_tag=JKA73_26475] [protein=hypothetical protein] [protein_id=QQR48350.1] [location=6642048..6643223] [gbkey=CDS]	17	42679	1	1	1	1	3.1	6.69	0.06
145	lcl|CP068048.1_prot_2781	[locus_tag=JKA73_14080] [protein=IS3 family transposase] [pseudo=true] [location=complement(3363237..3364468)] [gbkey=CDS]	17	43267	1	1	1	1	2.4	11.34	0.06
146	lcl|CP068048.1_prot_QQR42661.1_5279	[locus_tag=JKA73_26755] [protein=tetratricopeptide repeat protein] [protein_id=QQR42661.1] [location=complement(6708938..6711301)] [gbkey=CDS]	17	84613	1	1	1	1	2	7.22	0.03
147	lcl|CP068048.1_prot_3625	[locus_tag=JKA73_18400] [protein=acyltransferase domain-containing protein] [pseudo=true] [location=complement(4341102..4345845)] [gbkey=CDS]	17	165819	1	1	1	1	0.8	12.23	0.02
148	lcl|CP068048.1_prot_QQR44065.1_6836	[locus_tag=JKA73_34570] [protein=DUF4105 domain-containing protein] [protein_id=QQR44065.1] [location=complement(8564075..8566861)] [gbkey=CDS]	17	102218	1	1	1	1	1.6	6.32	0.03
149	lcl|CP068048.1_prot_7282	[locus_tag=JKA73_36825] [protein=hypothetical protein] [pseudo=true] [location=complement(9089278..9091171)] [gbkey=CDS]	17	68855	1	1	1	1	2.4	12.08	0.04
150	lcl|CP068048.1_prot_QQR41774.1_4294	[locus_tag=JKA73_21760] [protein=polyketide synthase] [protein_id=QQR41774.1] [location=complement(5402386..5404596)] [gbkey=CDS]	17	79288	1	1	1	1	1.8	5.43	0.03
151	lcl|CP068048.1_prot_6950	[locus_tag=JKA73_35140] [protein=response regulator] [pseudo=true] [location=8702678..8702924] [gbkey=CDS]	17	8578	1	1	1	1	18.3	11.82	0.31
152	lcl|CP068048.1_prot_QQR42184.1_4739	[locus_tag=JKA73_24030] [protein=chemotaxis protein CheA] [protein_id=QQR42184.1] [location=complement(6043140..6045728)] [gbkey=CDS]	16	90716	1	1	1	1	1.2	5.93	0.03
153	lcl|CP068048.1_prot_QQR45241.1_713	[locus_tag=JKA73_03620] [protein=hypothetical protein] [protein_id=QQR45241.1] [location=complement(851710..852273)] [gbkey=CDS]	16	20949	1	1	1	1	5.9	9.06	0.12
154	lcl|CP068048.1_prot_QQR45463.1_956	[locus_tag=JKA73_04840] [protein=cysteine synthase family protein] [protein_id=QQR45463.1] [location=complement(1154972..1155937)] [gbkey=CDS]	16	34520	1	1	1	1	2.2	6.91	0.07
155	lcl|CP068048.1_prot_QQR44938.1_381	[gene=rraA] [locus_tag=JKA73_01955] [protein=ribonuclease E activity regulator RraA] [protein_id=QQR44938.1] [location=complement(459914..460411)] [gbkey=CDS]	16	17890	1	1	1	1	4.8	5.92	0.15
156	lcl|CP068048.1_prot_QQR47851.1_3577	[locus_tag=JKA73_18135] [protein=hypothetical protein] [protein_id=QQR47851.1] [location=complement(4265113..4266408)] [gbkey=CDS]	16	47773	1	1	1	1	3.2	5.25	0.05
157	lcl|CP068048.1_prot_QQR41559.1_4060	[locus_tag=JKA73_20590] [protein=DUF1772 domain-containing protein] [protein_id=QQR41559.1] [location=complement(5087251..5087742)] [gbkey=CDS]	16	17889	1	1	1	1	3.1	10.47	0.14
158	lcl|CP068048.1_prot_QQR41918.1_4451	[locus_tag=JKA73_22555] [protein=valine--tRNA ligase] [protein_id=QQR41918.1] [location=complement(5605907..5609800)] [gbkey=CDS]	16	142291	1	1	1	1	0.8	8.54	0.02
159	lcl|CP068048.1_prot_QQR42168.1_4721	[locus_tag=JKA73_23940] [protein=hypothetical protein] [protein_id=QQR42168.1] [location=complement(6021336..6023576)] [gbkey=CDS]	16	80061	2	2	1	1	1.3	8.46	0.03
160	lcl|CP068048.1_prot_QQR44429.1_7249	[locus_tag=JKA73_36635] [protein=zf-HC2 domain-containing protein] [protein_id=QQR44429.1] [location=9047605..9048093] [gbkey=CDS]	15	17940	1	1	1	1	6.2	8.38	0.14
161	lcl|CP068048.1_prot_QQR46496.1_2106	[locus_tag=JKA73_10690] [protein=DUF4419 domain-containing protein] [protein_id=QQR46496.1] [location=2552638..2554212] [gbkey=CDS]	15	58902	1	1	1	1	1	5.96	0.04
162	lcl|CP068048.1_prot_QQR43398.1_6093	[locus_tag=JKA73_30850] [protein=IS3 family transposase] [protein_id=QQR43398.1] [location=7694016..7694840] [gbkey=CDS]	15	31251	1	1	1	1	2.6	9.77	0.08
163	lcl|CP068048.1_prot_QQR47830.1_3555	[gene=menE] [locus_tag=JKA73_18025] [protein=o-succinylbenzoate--CoA ligase] [protein_id=QQR47830.1] [location=4241930..4243378] [gbkey=CDS]	15	51423	1	1	1	1	2.7	6.4	0.05
164	lcl|CP068048.1_prot_QQR42108.1_4655	[locus_tag=JKA73_23590] [protein=MaoC family dehydratase] [protein_id=QQR42108.1] [location=complement(5938773..5939435)] [gbkey=CDS]	15	24027	1	1	1	1	8.6	9.38	0.11
165	lcl|CP068048.1_prot_QQR48475.1_6918	[locus_tag=JKA73_34980] [protein=PAS domain-containing sensor histidine kinase] [protein_id=QQR48475.1] [location=complement(8664616..8665776)] [gbkey=CDS]	15	42205	1	1	1	1	4.4	7.17	0.06
166	lcl|CP068048.1_prot_QQR44276.1_7076	[locus_tag=JKA73_35770] [protein=hypothetical protein] [protein_id=QQR44276.1] [location=8843543..8844793] [gbkey=CDS]	15	45398	1	1	1	1	4.6	6.29	0.06
167	lcl|CP068048.1_prot_QQR45910.1_1425	[locus_tag=JKA73_07215] [protein=sigma-70 family RNA polymerase sigma factor] [protein_id=QQR45910.1] [location=complement(1726216..1726983)] [gbkey=CDS]	15	28054	1	1	1	1	8.2	6.1	0.09
168	lcl|CP068048.1_prot_QQR46296.1_1868	[locus_tag=JKA73_09465] [protein=hypothetical protein] [protein_id=QQR46296.1] [location=complement(2274298..2275035)] [gbkey=CDS]	15	26067	1	1	1	1	4.5	4.48	0.1
169	lcl|CP068048.1_prot_QQR44555.1_7389	[locus_tag=JKA73_37360] [protein=insulinase family protein] [protein_id=QQR44555.1] [location=complement(9222063..9224924)] [gbkey=CDS]	15	104931	1	1	1	1	0.9	8.92	0.02
170	lcl|CP068048.1_prot_QQR45827.1_1340	[locus_tag=JKA73_06760] [protein=hypothetical protein] [protein_id=QQR45827.1] [location=1621952..1626481] [gbkey=CDS]	15	159312	1	1	1	1	1	8.13	0.02
171	lcl|CP068048.1_prot_QQR45574.1_1070	[locus_tag=JKA73_05410] [protein=YfbM family protein] [protein_id=QQR45574.1] [location=complement(1299397..1299912)] [gbkey=CDS]	15	18992	1	1	1	1	9.4	4.23	0.14
172	lcl|CP068048.1_prot_QQR42684.1_5303	[gene=rpsB] [locus_tag=JKA73_26880] [protein=30S ribosomal protein S2] [protein_id=QQR42684.1] [location=complement(6739703..6740677)] [gbkey=CDS]	15	35992	1	1	1	1	1.9	8.89	0.07
173	lcl|CP068048.1_prot_QQR44707.1_136	[locus_tag=JKA73_00680] [protein=hypothetical protein] [protein_id=QQR44707.1] [location=complement(169499..172231)] [gbkey=CDS]	14	101415	1	1	1	1	1.8	9.29	0.03
174	lcl|CP068048.1_prot_QQR44291.1_7091	[locus_tag=JKA73_35845] [protein=ABC transporter ATP-binding protein] [protein_id=QQR44291.1] [location=complement(8860286..8861047)] [gbkey=CDS]	14	27253	1	1	1	1	7.9	6.14	0.09
175	lcl|CP068048.1_prot_QQR45002.1_451	[locus_tag=JKA73_02310] [protein=nuclear transport factor 2 family protein] [protein_id=QQR45002.1] [location=complement(532818..533249)] [gbkey=CDS]	14	15706	1	1	1	1	6.3	4.53	0.17
176	lcl|CP068048.1_prot_QQR43151.1_5820	[locus_tag=JKA73_29485] [protein=theronine dehydrogenase] [protein_id=QQR43151.1] [location=complement(7368931..7371210)] [gbkey=CDS]	13	81999	1	1	1	1	3.2	5.89	0.03
177	lcl|CP068048.1_prot_5955	[locus_tag=JKA73_30160] [protein=kelch-like protein] [pseudo=true] [location=complement(7520512..7522879)] [gbkey=CDS]	13	86607	1	1	1	1	1.1	11.94	0.03
178	lcl|CP068048.1_prot_QQR43795.1_6536	[locus_tag=JKA73_33070] [protein=protein kinase] [protein_id=QQR43795.1] [location=complement(8220025..8223717)] [gbkey=CDS]	13	130716	1	1	1	1	0.8	5.22	0.02
